# Supplementary material for: A Single Nucleotide Polymorphism within the Acetyl-Coenzyme A Carboxylase Beta Gene Is Associated with Proteinuria in Patients with Type 2 Diabetes
Source: PLoS Genet. 2010 Feb 12;6(2):e1000842. doi: 10.1371/journal.pgen.1000842 (PMC2820513; doi:10.1371/journal.pgen.1000842)
Supplement: Table S2 — Clinical characteristics of the subjects. Values are mean ± SE, NA: not available. (A) Data at baseline are presented. (B) 5 unknown. (C) 6 unknown. (D) p<0.05 versus control. (0.09 MB DOC) [file pgen.1000842.s005.doc]

|  | Japanese 1 | | Japanese 2 a | | Japanese 3 a | |
| --- | --- | --- | --- | --- | --- | --- |
|  | Case  proteinuria | control | Progression  proteinuria | control | Progression  proteinuria | control |
| Sex (M:F) | 505:244(b) (d) | 267:285(c) | 20:12 | 110:58 | 53:18 | 124:69 |
| Age (year) | 60.1  0.4(d) | 62.4  0.5 | 60.9  1.7 | 60.4  0.7 | 53.6  1.3 | 53.1  0.8 |
| BMI (kg/m2) | 23.7  0.2 | 23.6  0.2 | 24.9  0.5 | 23.9  0.3 | 22.3  0.4(d) | 23.9  0.2 |
| HbA1c (%) | 7.6  0.2 | 7.6  0.1 | 7.7  0.2 | 7.4  0.1 | 8.9  0.3(d) | 7.8  0.1 |
| SBP (mmHg) | 140  1(d) | 132  1 | 138  3 | 137  1 | 128  2 | 130  2 |
| DBP (mmHg) | 76  0.5(d) | 74  0.5 | 77  2 | 77  1 | 77  1 | 76  2 |
| Duration (year) | 19.3  0.4(d) | 15.3  0.4 | 14.5  1.6 | 12.8  0.7 | 8.5  0.9 | 7.6  0.6 |

|  | Japanese 4 | | Korean | | Singapore | |
| --- | --- | --- | --- | --- | --- | --- |
|  | case  ESRD | control | case  ESRD | control | Case  Proteinuria | control |
| Sex (M:F) | 199 : 101 | 149 : 69 | 105:72(d) | 76:120 | 112:87(d) | 87:125 |
| Age (year) | 64.4  0.6 | 65.0  0.7 | 61.0  0.7(d) | 63.8  0.6 | 64.9  0.7 | 64.8  0.6 |
| BMI (kg/m2) | 22.1  0.2(d) | 23.4  0.3 | 23.2  0.2 | 23.7  0.2 | 25.7  0.3(d) | 24.7  0.3 |
| HbA1c (%) | 6.12  0.07(d) | 6.80  0.07 | 7.2  0.1(d) | 7.8  0.1 | 7.8  0.1(d) | 7.5  0.1 |
| SBP (mmHg) | 142  1(d) | 121  1 | 150  2(d) | 131  1 | 137  1(d) | 135  1 |
| DBP (mmHg) | 73  1(d) | 69  1 | 83  1(d) | 77  1 | 78  1(d) | 76  1 |
| Duration (year) | 21.9  0.9(d) | 16.3  0.4 | 18.1  0.6(d) | 20.6  0.4 | 11.2  1.0(d) | 17.7  1.0 |

|  | European 1 (Steno 2) a | | European 2 (Wake Forest) | | Steno Type 1 | |
| --- | --- | --- | --- | --- | --- | --- |
|  | Progression  proteinuria | control | case  ESRD with ever proteinuria | control | case  proteinuria | control |
| Sex (M:F) | 37:10 | 80:30 | 235:246 | 188:239 | 278:180(d) | 234:208 |
| Age (year) | 57.2  1.0(d) | 54.1  0.7 | 65.5 ± 0.5(d) | 63.1 ± 0.4 | 42.1 ± 0.5(d) | 45.4 ± 0.5 |
| BMI (kg/m2) | 29.2  0.6 | 30.10.4 | 29.4 ± 0.3(d) | 32.5 ± 0.3 | 24.2 ± 0.2 | 24.2 ± 0.1 |
| HbA1c (%) | 8.4 ± 0.2 | 8.6 ± 0.2 | NA | NA | 9.4 ± 0.1(d) | 8.4 ± 0.1 |
| SBP (mmHg) | 150 ± 3 | 147 ± 2 | NA | NA | 144 ± 1(d) | 134 ± 1 |
| DBP (mmHg) | 86 ± 2(d) | 85 ± 1 | NA | NA | 82 ± 1(d) | 76 ± 1 |
| Duration (year) | 7.8 ± 0.8 | 6.8 ± 0.6 | 21.0 ± 0.4(d) | 12.7 ± 0.4 | 28.2 ± 0.4 | 27.8 ± 0.5 |
